# Supplementary material
Source: MDPI journal article supplement (https://www.mdpi.com/2073-8994/14/12/2490)
Supplement: s1 [file s1]

## Song list.

**Participant:**

**Date – hour**

**Day 1:** .....

- Session 1: Strauss J. Waltzes .....
- Session 2: Brahms J. Symphony nº 1.....

**Day 2:** .....

- Session 3: Zarzuela. Preludios de Zarzuela.....
- Session 4: Tchaikovsky P.I. Swan Lake and The Nutcracker .....

**Day 3:** .....

- Session 5: Bruce Springsteen. Ocean surf.....
- Session 6: Schubert. Symphony nº 9.....

**Day 4:** .....

- Session 7: Rimsky-Korsakov. Sherezade.....
- Session 8: Natalie Cole. Greatest Hits.....

**Day 5:** .....

- Session 9: Liszt F. Prometeo – Tasso.....
- Session 10: Falla M. El amor brujo – El sombrero de tres picos.....
